# Supplementary material
Source: HighWire-hosted journal article supplement (https://www.annfammed.org/content/suppl/2006/07/25/4.4.327)
Supplement: Sussman_Appendix_4.pdf [file Sussman_Appendix_4.pdf]

Online Supplementary Material

Sussman AL, Williams R, Leverence R, Gloyd P, Jr, Crabtree BF. The art and complexity of primary care clinicians' preventive counseling decisions: obesity as a case study. *Ann Fam Med*. 2006;4:327-333.

<http://www.annfammed.org/cgi/content/full/4/4/327/DC1>

**Supplemental Appendix 4. Results of Factor Analysis of Responses to Survey Questions About Reasons for Preventive Counseling for Obesity**

| Survey Question                                                                                                           | Factor Loadings                                  |                                        |                                                      |
|---------------------------------------------------------------------------------------------------------------------------|--------------------------------------------------|----------------------------------------|------------------------------------------------------|
|                                                                                                                           | Factor 1<br>Societal<br>Influences on<br>Obesity | Factor 2<br>Clinician Sense<br>of Duty | Factor 3<br>Conditions<br>Conducive to<br>Counseling |
| Eigenvalue                                                                                                                | 5.76                                             | 1.46                                   | 1.05                                                 |
| Variance explained by factor, %                                                                                           | 4.94                                             | 1.74                                   | 1.58                                                 |
| Compared with other issues in the clinical encounter, I may choose not to spend time on counseling about obesity because: |                                                  |                                        |                                                      |
| Patients are not receptive to discussing this topic                                                                       | 0.31                                             | 0.09                                   | 0.15                                                 |
| I don't feel it is time well spent                                                                                        | 0.45                                             | -0.28                                  | 0.21                                                 |
| I don't have much success                                                                                                 | <b>0.76</b>                                      | -0.23                                  | 0.14                                                 |
| It is a societal problem that my efforts have little impact on                                                            | <b>0.75</b>                                      | -0.26                                  | -0.03                                                |
| Few patients are motivated to make the lifestyle changes needed                                                           | <b>0.66</b>                                      | 0.03                                   | 0.07                                                 |
| There isn't enough time                                                                                                   | 0.14                                             | -0.03                                  | <b>0.63</b>                                          |
| I don't feel like I have the skills or knowledge needed to be effective in this area                                      | 0.10                                             | -0.25                                  | <b>0.53</b>                                          |
| My patients generally do not have the personal or community resources to be able to deal with this                        | 0.38                                             | 0.04                                   | 0.39                                                 |
| I spend time on counseling about obesity because:                                                                         |                                                  |                                        |                                                      |
| I have had some success with this in the past                                                                             | -0.043                                           | 0.19                                   | -0.19                                                |
| It is recommended by clinical guidelines                                                                                  | -0.010                                           | <b>0.41</b>                            | 0                                                    |
| My patients are unlikely to hear a similar message elsewhere                                                              | 0.05                                             | <b>0.64</b>                            | -0.16                                                |
| Interactions with my colleagues have influenced me to do so                                                               | -0.05                                            | 0.16                                   | -0.02                                                |
| Because of my personal belief that the non-obese have a significantly better quality of life                              | -0.02                                            | <b>0.35</b>                            | -0.02                                                |

Note: Bold entries indicate those survey items that were retained in subsequent analyses of the factors.
